# Supplementary material
Source: PubMed Central journal article supplement (PMC8092941)

Supplementary Data for

**Aggressive B-cell Lymphoma with MYC/TP53 Dual Alterations Displays Distinct  
Clinicopathobiological Features and Response to Novel Targeted Agents**

**Supplementary Table S1.** Clinicopathologic characteristics of patients with *de novo* DLBCL with dual MYC/TP53 aberrations

|                                | Total<br>N | Myc <sup>high</sup><br>Mut-TP53<br>n (% of total<br>N) | <i>P</i> | Myc <sup>high</sup> p53 <sup>high</sup><br>n (% of total<br>N) | <i>P</i>     | MYC-R<br>Mut-TP53<br>n (% of total<br>N*) | <i>P</i>     | Total<br>N* |
|--------------------------------|------------|--------------------------------------------------------|----------|----------------------------------------------------------------|--------------|-------------------------------------------|--------------|-------------|
| <b>Patients</b>                | 480        | 69 (14.4)                                              |          | 78 (16.5)                                                      |              | 15 (4.7)                                  |              | 320         |
| <b>Sex</b>                     |            |                                                        |          |                                                                |              |                                           |              |             |
| <b>F</b>                       | 198        | 28 (14.1)                                              | 1.0      | 35 (17.7)                                                      | .53          | 5 (3.7)                                   | .60          | 136         |
| <b>M</b>                       | 282        | 41 (14.5)                                              |          | 43 (15.2)                                                      |              | 10 (5.4)                                  |              | 184         |
| <b>Age, years</b>              |            |                                                        |          |                                                                |              |                                           |              |             |
| <b>≤ 60</b>                    | 171        | 25 (14.6)                                              | .89      | 25 (14.6)                                                      | .52          | 7 (6.5)                                   | .27          | 107         |
| <b>&gt; 60</b>                 | 309        | 44 (14.2)                                              |          | 53 (17.2)                                                      |              | 8 (3.8)                                   |              | 213         |
| <b>Stage</b>                   |            |                                                        |          |                                                                |              |                                           |              |             |
| <b>I - II</b>                  | 216        | 27 (12.5)                                              | .19      | 30 (13.9)                                                      | .14          | 4 (3.0)                                   | .19          | 134         |
| <b>III-IV</b>                  | 246        | 42 (17.1)                                              |          | 48 (19.5)                                                      |              | 11 (6.4)                                  |              | 173         |
| <b>B symptom</b>               |            |                                                        |          |                                                                |              |                                           |              |             |
| <b>Yes</b>                     | 132        | 16 (12.1)                                              | .37      | 21 (15.9)                                                      | .78          | 7 (6.9)                                   | .40          | 102         |
| <b>No</b>                      | 282        | 45 (16.0)                                              |          | 49 (17.4)                                                      |              | 8 (4.0)                                   |              | 198         |
| <b>LDH level</b>               |            |                                                        |          |                                                                |              |                                           |              |             |
| <b>Normal</b>                  | 165        | 24 (14.5)                                              | 1.0      | 25 (14.3)                                                      | .60          | 2 (1.8)                                   | <b>.05</b>   | 114         |
| <b>Elevated</b>                | 268        | 39 (14.6)                                              |          | 47 (26.0)                                                      |              | 12 (7.1)                                  |              | 168         |
| <b>ECOG performance status</b> |            |                                                        |          |                                                                |              |                                           |              |             |
| <b>&lt; 2</b>                  | 357        | 52 (14.6)                                              | .84      | 57 (16.0)                                                      | .13          | 6 (2.6)                                   | .58          | 228         |
| <b>≥2</b>                      | 57         | 7 (12.3)                                               |          | 14 (24.6)                                                      |              | 1 (3.3)                                   |              | 31          |
| <b>Extranodal sites</b>        |            |                                                        |          |                                                                |              |                                           |              |             |
| <b>0 - 1</b>                   | 357        | 46 (13.4)                                              | .26      | 57 (14.3)                                                      | <b>.0096</b> | 6 (2.6)                                   | <b>.0039</b> | 235         |
| <b>≥ 2</b>                     | 100        | 18 (18.0)                                              |          | 14 (26.0)                                                      |              | 8 (11.9)                                  |              | 67          |
| <b>Tumor size</b>              |            |                                                        |          |                                                                |              |                                           |              |             |
| <b>&lt; 5 cm</b>               | 219        | 28 (12.8)                                              | .18      | 30 (13.7)                                                      | .067         | 1 (0.7)                                   | <b>.044</b>  | 149         |
| <b>≥ 5 cm</b>                  | 151        | 27 (17.9)                                              |          | 32 (21.2)                                                      |              | 6 (5.6)                                   |              | 108         |
| <b>IPI score</b>               |            |                                                        |          |                                                                |              |                                           |              |             |
| <b>0 - 2</b>                   | 266        | 33 (12.4)                                              | .26      | 35 (13.2)                                                      | <b>.012</b>  | 6 (3.5)                                   | .26          | 171         |
| <b>3 - 5</b>                   | 165        | 27 (16.4)                                              |          | 38 (23.0)                                                      |              | 8 (7.1)                                   |              | 112         |
| <b>Cell of origin</b>          |            |                                                        |          |                                                                |              |                                           |              |             |
| <b>ABC</b>                     | 231        | 28 (12.1)                                              | .19      | 33 (18.1)                                                      | .26          | 3 (1.9)                                   | <b>.031</b>  | 161         |

|                                    |     |           |                  |           |                  |           |                  |     |
|------------------------------------|-----|-----------|------------------|-----------|------------------|-----------|------------------|-----|
| <b>GCB</b>                         | 248 | 41 (16.5) |                  | 45 (14.3) |                  | 12 (7.5)  |                  | 159 |
| <b>Ki-67</b>                       |     |           |                  |           |                  |           |                  |     |
| < 70%                              | 163 | 13 (8.0)  | <b>.0038</b>     | 17 (10.4) | <b>.013</b>      | 1 (1)     | .44              | 98  |
| ≥ 70%                              | 312 | 55 (17.6) |                  | 60 (19.2) |                  | 7 (3.3)   |                  | 215 |
| <b>Therapy response</b>            |     |           |                  |           |                  |           |                  |     |
| <b>CR</b>                          | 364 | 36 (9.9)  | <b>&lt;.0001</b> | 45 (12.4) | <b>.0001</b>     | 2 (0.8)   | <b>&lt;.0001</b> | 239 |
| <b>PR+PD+SD</b>                    | 116 | 33 (28.4) |                  | 33 (28.4) |                  | 13 (16.0) |                  | 81  |
| <b>Recurrence</b>                  |     |           |                  |           |                  |           |                  |     |
| <b>Yes</b>                         | 194 | 43 (22.2) | <b>&lt;.0001</b> | 43 (22.2) | <b>.0001</b>     | 6 (4.8)   | .34              | 125 |
| <b>No</b>                          | 285 | 24 (8.4)  |                  | 35 (12.3) |                  | 2 (2.3)   |                  | 88  |
| <b>MYC/BCL2 double-hit</b>         |     |           |                  |           |                  |           |                  |     |
| <b>No</b>                          | 389 | 50 (12.9) | .13              | 58 (14.9) | <b>.0066</b>     | 10 (3.3)  | <b>&lt;.0001</b> | 306 |
| <b>Yes</b>                         | 10  | 3 (30.0)  |                  | 5 (50.0)  |                  | 5 (41.7)  |                  | 12  |
| <b>MYC/BCL-2 double-expression</b> |     |           |                  |           |                  |           |                  |     |
| <b>No</b>                          | 315 | 30 (9.5)  | <b>&lt;.0001</b> | 35 (11.1) | <b>&lt;.0001</b> | 9 (3.4)   | .16              | 306 |
| <b>Yes</b>                         | 157 | 38 (24.2) |                  | 41 (26.1) |                  | 6 (7.2)   |                  | 12  |

\* Number of cases with *MYC* rearrangement data available. Detailed numbers for single and combinational markers are in Supplementary Table S2.

*P* values are by the Fisher's exact test for difference between DLBCL cases with concurrent *MYC*/TP53 aberrations (shown in the table) and those without (not shown).

Abbreviation: *MYC*-R, *MYC* rearrangement; LDH, lactate dehydrogenase; ECOG, Eastern Cooperative Oncology Group; IPI, International Prognostic Index; CR, complete remission; PR, partial remission; PD, progressive disease; SD, stable disease.

**Supplementary Table S2.** Frequency of single or dual abnormal Myc protein, p53 protein, BCL-2 protein, *MYC* gene, and *TP53* gene in the studied patients with DLBCL treated with R-CHOP

| <b>Biomarker</b>                          | <b>Number of positive cases/total tested cases</b> | <b>Positive rate</b> |
|-------------------------------------------|----------------------------------------------------|----------------------|
| <b>In 480 cohort</b>                      |                                                    |                      |
| <b>Protein expression marker</b>          |                                                    |                      |
| Myc <sup>high</sup> (Myc >40%)            | 307/475                                            | 64.6%                |
| p53 <sup>high</sup> (p53 >30%)            | 105/474                                            | 22.2%                |
| BCL-2 <sup>high</sup> (BCL-2 >50%)        | 230/473                                            | 48.6%                |
| <b>Genetic lesion markers</b>             |                                                    |                      |
| <i>TP53</i> mutation (Mut- <i>TP53</i> )  | 108/480                                            | 22.5%                |
| <i>MYC</i> rearrangement ( <i>MYC</i> -R) | 34/313                                             | 10.9%                |
| <b>Combinational markers</b>              |                                                    |                      |
| Myc <sup>high</sup> p53 <sup>high</sup>   | 78/474                                             | 16.5%                |
| Myc <sup>high</sup> Mut- <i>TP53</i>      | 69/480                                             | 14.4%                |
| <i>MYC</i> -R p53 <sup>high</sup>         | 13/310                                             | 4.2%                 |
| <i>MYC</i> -R Mut- <i>TP53</i>            | 8/313                                              | 2.6%                 |
| <b>In 487 cohort*</b>                     |                                                    |                      |
| <i>MYC</i> -R p53 <sup>high</sup>         | 18/315                                             | 5.7%                 |
| <i>MYC</i> -R Mut- <i>TP53</i>            | 15/320                                             | 4.7%                 |

\* The post-hoc 7 cases were all *MYC*-rearranged *TP53*-mutated cases (*MYC*-R Mut-*TP53*), added to the 480 cohort for sake of better prognostic analysis which however increased the “natural” frequency of *MYC*-R Mut-*TP53*.

**Supplementary Table S3.** Prognostic factors by univariate analysis and multivariate analysis in DLBCL

A. Univariate analysis

|                                         | Overall survival |           |          | Progression-free survival |           |          |
|-----------------------------------------|------------------|-----------|----------|---------------------------|-----------|----------|
|                                         | HR               | 95% CI    | <i>p</i> | HR                        | 95% CI    | <i>p</i> |
| B symptom                               | 1.61             | 1.17-2.21 | .004     | 1.60                      | 1.17-2.18 | .003     |
| IPI >2                                  | 3.13             | 2.15-4.56 | <.001    | 2.73                      | 1.92-3.87 | <.001    |
| ABC subtype                             | 1.52             | 1.13-2.04 | .005     | 1.45                      | 1.09-1.93 | .01      |
| <i>MYC</i> -R Mut- <i>TP53</i>          | 3.71             | 1.62-8.48 | .002     | 3.30                      | 1.44-7.55 | .005     |
| <i>MYC</i> -R p53 <sup>high</sup>       | 2.61             | 0.92-7.45 | .072     | 2.88                      | 1.05-7.84 | .039     |
| Myc <sup>high</sup> Mut- <i>TP53</i>    | 2.33             | 1.65-3.29 | <.001    | 2.45                      | 1.75-3.43 | <.001    |
| Myc <sup>high</sup> p53 <sup>high</sup> | 1.85             | 1.37-2.51 | <.001    | 1.89                      | 1.41-2.53 | <.001    |

B. Multivariate analysis

|                                | Overall survival |            |          | Progression-free survival |           |          |
|--------------------------------|------------------|------------|----------|---------------------------|-----------|----------|
|                                | HR               | 95% CI     | <i>p</i> | HR                        | 95% CI    | <i>p</i> |
| B symptom                      | 1.40             | .93-2.11   | .11      | 1.52                      | 1.02-2.25 | .04      |
| IPI score >2                   | 2.60             | 1.59-4.26  | <.001    | 2.16                      | 1.37-3.41 | .001     |
| ABC subtype                    | 1.39             | .92-2.12   | .12      | 1.30                      | .87-1.95  | .20      |
| <i>MYC</i> -R Mut- <i>TP53</i> | 4.40             | 1.82-10.65 | .001     | 3.86                      | 1.60-9.32 | .003     |

Abbreviation: HR, Hazard Ratio; CI, confidence interval; IPI, International Prognostic Index; ABC, activated B-cell like; *MYC*-R, *MYC* rearrangement; Mut, mutant.

**Supplementary Table S4.** Gene expression signatures identified by comparing DLBCL patients with concurrent MYC-R Mut-TP53 or Myc<sup>high</sup> Mut-TP53 alterations (double-positive) with DLBCL patients with none or the alterations (double-negative)

| Upregulated genes                                                                                                                                                                                                                                                                                                                                                                                                                                                                                                                                           | Downregulated genes                                                                                                                                                                                                                                                                                                                                                                                                                                                                                                                                                                                                                                                                                                                                                                                                                                                                                                                                                                                                                                                                                                                                                                                                                                                                                                                                                                                                                                                                                                                                                                                                                           |
|-------------------------------------------------------------------------------------------------------------------------------------------------------------------------------------------------------------------------------------------------------------------------------------------------------------------------------------------------------------------------------------------------------------------------------------------------------------------------------------------------------------------------------------------------------------|-----------------------------------------------------------------------------------------------------------------------------------------------------------------------------------------------------------------------------------------------------------------------------------------------------------------------------------------------------------------------------------------------------------------------------------------------------------------------------------------------------------------------------------------------------------------------------------------------------------------------------------------------------------------------------------------------------------------------------------------------------------------------------------------------------------------------------------------------------------------------------------------------------------------------------------------------------------------------------------------------------------------------------------------------------------------------------------------------------------------------------------------------------------------------------------------------------------------------------------------------------------------------------------------------------------------------------------------------------------------------------------------------------------------------------------------------------------------------------------------------------------------------------------------------------------------------------------------------------------------------------------------------|
| <b>Integrated Mut-TP53 MYC-R signature: MYC-R Mut-TP53 vs. Non-MYC-R Wt-TP53 (FDR 0.0005)</b>                                                                                                                                                                                                                                                                                                                                                                                                                                                               |                                                                                                                                                                                                                                                                                                                                                                                                                                                                                                                                                                                                                                                                                                                                                                                                                                                                                                                                                                                                                                                                                                                                                                                                                                                                                                                                                                                                                                                                                                                                                                                                                                               |
| <p>POLR3B, LOC100507266, <b>CDKN2A</b>, WASF1, DNMT3B, UNG*, UHRF1*, <b>TERT</b>, <u>NCR3LG1</u>, SMARCA4, E2F2, FZD3, UBE3D, <b>BMP3</b>, RAG2, <b>TFDP2</b>, <b>ZNF385B</b>, BEST3, XYLB, NTF3, C7orf33, PHOX2A, LOC101928191, NR1I3, <b>SLC25A27</b>, CYP39A1, LZTS1, ART1, NFE2, LINC00550, LOC102725116, <b>OR51B6</b>, <b>NAA11</b>, LOC284561, LINC01360, OR2F1, <b>APOH</b>, MOGAT1, <b>PLA2G2F</b>, DKFZp434E1119, C1QTNF6, LRRC48, LOC101930593, <b>HMG5</b>, ACP6, <b>SLITRK3</b>, CELSR2, FOXO6, <b>GJB4</b>, TBX20, STRBP, <b>DIP2C</b></p>    | <p>NPLOC4, SP140L, MDFIC, LOC285628, <u>TICAM2</u>, LRP10, UNC50, SPATA20, RAC2, <b>FAS</b>, <u>NFAT5</u>, IL10RA, MPEP1, <b>RASSF5</b>, <b>IL24</b>, <u>YIPF5</u>, PIGF, <u>IL21R</u>, ZBTB4, PBXIP1, CMTM6, TNFRSF1B, LOC541471, <u>SERPINB1</u>, IDS, <u>JAK2</u>, NCOA1, RAP2C, F8A1, DOCK8, REEP5, MGEA5, <b>SH3GLB1</b>, TRIM21, SNX18, <u>MIR155HG</u>, AHR, <b>CFLAR</b>, <b>SP100</b>, SP110, CD44, STAT3, <u>JAK1</u>, <b>BCL2A1</b>, UGCG, TMSB4X, RNASEK, NFKBIA, <b>MCL1</b>, YPEL5, PTTG1P, WSB2, LOC100507463, HCP5, <b>CASP4</b>, <u>LITAF</u>, CDC42SE1, <b>RASSF4</b>, <u>IL2RG</u>, <u>VMP1</u>, <u>HLA-E</u>, <u>HLA-F</u>, <u>HLA-B</u>, <u>HLA-C</u>, <u>HLA-A</u>, <u>HLA-G</u>, <u>TAP1</u>, <u>TPP1</u>, <b>HIPK3</b>, PLEK, EDF1, <b>PEA15</b>, ANXA7, ATP6V0E1, CTSH, CAP1, ARPC2*, ARPC5*, <u>LCP1</u>, SH3BGRL3, TMSB10, UBB*, LGALS8, IL6ST, KIAA1551, GVINP1, N4BP2L2, ARL6IP5, UBD, <u>FYB</u>, <u>CD3D</u>, SLFN5, <u>LCP2</u>, RAB27A, <u>SLAMF7</u>, GBP2, STAT1, <b>TNFSF10</b>, KCTD12, ITM2B, ASAH1, ADAMDEC1, LYZ, GBP3, <b>DAPK1</b>, GIMAP2, CHI3L1, ENPP2, PTGDS, PLA2G2D, <u>PTPRC</u>, SPPL2A, SAT1, <b>SRGN</b>, CDC42SE2, NLRC5, <b>SAMD9L</b>, PLSCR1, RNF19A, PNRC1, <b>TNFAIP3</b>, <u>STAM2</u>, <u>IRF2BP2</u>, <u>HLA-DMA</u>, <u>HLA-DRA</u>, <u>HLA-DMB</u>, <b>RFFL</b>, FNBP1, CD58, CD53, <b>RASSF2*</b>, TACC1, PIP4K2A, RNF111, WDR26, <u>IL13RA1</u>, CXCL13, <b>BIRC3</b>, PARP12, TMEM2, <u>APOBEC3G</u>, TINF2, VOPP1, CLIP1, ZFP36, PPAPDC1B, RGS1, AHNAK, UBALD2, ELL2, DOCK10, CCR7, SOS1, TNIP1, <b>FAM129A</b>, <b>RUNX3</b>, FAM65B, <u>CD99</u>, ZNF224, OAZ2, MAFF</p> |
| <b>Integrated Myc<sup>high</sup> Mut-TP53 signature: Myc<sup>high</sup> Mut-TP53 vs. Myc<sup>low</sup> Wt-TP53 (FDR 0.0001)</b>                                                                                                                                                                                                                                                                                                                                                                                                                             |                                                                                                                                                                                                                                                                                                                                                                                                                                                                                                                                                                                                                                                                                                                                                                                                                                                                                                                                                                                                                                                                                                                                                                                                                                                                                                                                                                                                                                                                                                                                                                                                                                               |
| <p><b>CDKN2A</b>, OR7E12P, ALMS1-IT1, UBE3D, XPO5, MTAP, KIAA1958, WASF1, <b>TFDP2</b>, SRM, MPP6, APLP2, ZNF259, <b>NAA40</b>, FLJ41455, NREP, <b>HK2</b>, CCNE1, UNG*, POLR3B, MTHFD2L, ACACA, <u>MIR17HG</u>, <b>PEG10</b>, <b>EI24</b>, KIAA0020, CLSPN*, CEP152, FAM216A, AKAP1, SMARCA4, MCM7, EIF3B, <b>TERT</b>, C17orf75, EXOSC2, TIMM8B, WDR75, PUS7, DPY19L2P2, GART, ZNF639, <b>MYC</b>, DKC1, WDR77, IARS, DCUN1D5, <b>WDR4</b>, FARSB, KLHL23, GCSH, CDC25A, CDC7, SLC16A1, WDR43, BZW2, ASF1B, MZT1, PRKDC*, <b>SNHG1</b>, SKP2, TMEM48,</p> | <p>ARID5B, AHNAK, ZFP36L2, FLII, NCOA1, PPM1M, ZBTB4, HCP5, SOD3, TGOLN2, <u>HLA-F</u>, <u>HLA-E</u>, PBXIP1, LGALS8, ARL4C, GVINP1, TRAF3IP3, N4BP2L2, CYLD, <u>LCP2</u>, SLFN5, <u>FYB</u>, <u>CD3D</u>, <u>CD3E</u>, <b>BCL11B</b>, <u>TRBC1</u>, ITM2A, AAK1, FYN, <b>MAF</b>, GPR174, GBP2, FGL2, RNF213, <b>B2M</b>, IL6ST, ITM2B, GGTA1P, EVI2B, WIPF1, ATP2B4, INPP4A, <u>CD226</u>, LBH, DAZAP2, <b>RASSF5</b>, <u>JAK2</u>, <u>CD58</u>, <b>ZBTB38</b>, <b>TRAF1</b>, ITGB2-AS1, FGFR1,</p>                                                                                                                                                                                                                                                                                                                                                                                                                                                                                                                                                                                                                                                                                                                                                                                                                                                                                                                                                                                                                                                                                                                                         |

CDT1, SRSF1, TMEM97, PPAT, PAICS, RAD51AP1\*, ALPK1, IDS, MIR155HG, **VMP1**, DOCK10,  
CHEK1\*, UHRF1\*, KIF20A, MCM4, DEPDC1, GMNN, IL10RA, RGS3, VAMP2  
ATAD2, FAM72C, TOP2A, NCAPG, CKS2, MND1\*,  
CENPF, E2F8, RFC4, **AURKA**, **BUB1B**\*, DDX21,  
MCM8, **VRK1**, HSPD1, SERBP1, TOPBP1, DCAF13,  
**BIRC5**, TAF1D, SRPK1, NME2, NCL, SHMT2, LYAR,  
TFDP1, CMSS1, DIAPH3, SPC25, WHSC1,  
CAPRIN1, NDC80, POLR3G, POLE2\*, KIAA1524,  
CENPK, CHAF1A\*, CTPS1, UCHL3, CENPJ,  
GTPBP4, SSX2IP, CHCHD3, POLR1B, **ARMC10**,  
DNAJC2, DNMT1, SLC25A33, CCDC150, **USP13**,  
ACN9, PM20D2, LRRC41, ACTL6A, NUFIP1, IPO4,  
PRMT3, FBXO45, PFKM, NCR3LG1, **AIMP2**,  
MTCH2, PNPT1, SNORA71A, PNN, PGAM5, ASUN,  
DNAAF2, C11orf57, MORC2\*, PIGW, DTYMK,  
TAF4B, STRBP, PSPH, CYP39A1, RAE1, C15orf41,  
MARS2, TRIT1, PPP1R8, FZD3, DNMT3B, XYLB,  
CBX2, **E2F1**, SLC19A1, RCL1, EBPL, SQLE, EHBP1,  
UMODL1, PEX13, SLC25A37, C11orf85

---

Abbreviation: FDR, false discovery rate.

Notes: Genes involved in apoptosis, cell death, p53 pathway regulation, or tumor suppression are in bold; genes involved in DNA repair or DNA damage response are marked by \*; genes indicating impaired immune responses (such as MHC/TCR/CD3 components) are underlined by straight underlines; and micorRNA genes are underlined with wavy underlines.

**Supplementary Table S5.** Molecular, genetic and phenotypic status of 8 DLBCL/HGBCL cell lines by targeted next-generation sequencing, fluorescence in situ hybridization (FISH), and immunohistochemistry analysis

| Cell line | Subtype  | <i>MYC</i> rearrangement   | Myc expression | <i>TP53</i> mutation | p53 expression |
|-----------|----------|----------------------------|----------------|----------------------|----------------|
| OCI-LY10  | HGBCL-DH | <i>MYC</i> -R <sup>+</sup> | 30%            | Wild type            | 0%             |
| OCI-LY19  | HGBCL-DH | <i>MYC</i> -R <sup>+</sup> | 80%            | Wild type            | 10%            |
| MCA       | HGBCL-DH | <i>MYC</i> -R <sup>+</sup> | 50%            | Wild type            | 100%           |
| RC        | HGBCL-DH | <i>MYC</i> -R <sup>+</sup> | 60%            | Wild type            | 0%             |
| GR        | GCB      | FISH failed                | 50%            | Mutated<br>(p.G245A) | 90%            |
| HBL1      | ABC      | Non- <i>MYC</i> -R         | 80%            | Mutated<br>(p.V157A) | 70%            |
| MZ        | HGBCL-DH | <i>MYC</i> -R <sup>+</sup> | 40%            | Mutated<br>(p.Y126N) | 30%            |
| TMD8      | HGBCL-DH | <i>MYC</i> -R <sup>+</sup> | 60%            | Mutated<br>(p.F134C) | 90%            |

Abbreviation: HGBCL-DH, high-grade B cell lymphoma with *MYC/BCL2* double-hit; GCB, germinal-center B-cell-like; ABC, activated B-cell-like; *MYC*-R, *MYC* rearrangement.

## Supplementary Figure Legends

**Supplementary Figure S1. Morphologic and immunophenotypic features of DLBCL with *MYC* rearrangement (*MYC*-R) and *TP53* mutation (Mut-*TP53*) dual-alterations and high-grade B-cell lymphoma (HGBCL) with *MYC/BCL2* double-hit (DH) in representative patients.**

(A) A representative case with both *MYC*-R and Mut-*TP53* but not *BCL2*-R (*MYC/TP53* double-hit), characterized by monotonous sheets of medium or large-sized B-cells, with expression of Myc and p53, but negative for BCL-2. (B) A representative case with *MYC*-R, Mut-*TP53*, and *BCL2*-R (*MYC/BCL2/TP53* triple-hit), characterized by monotonous sheets of large-sized B-cells, with expression of Myc, BCL-2 and p53. (C) A representative case of HGBCL-DH (*MYC/BCL2* double-hit), characterized by monotonous sheets of large-sized B-cells, with expression of Myc and BCL-2, but negative for p53.

**Supplementary Figure S2. Prognostic impact of p53 and Myc protein overexpression as single or double abnormalities in overall DLBCL and GCB/ABC subtypes.**

**Supplementary Figure S3. Heatmap for gene expression signatures of *MYC/TP53* dual alterations.** (A) Differentially expressed genes (DEGs) between the *MYC*-R/Mut-*TP53* and *MYC*-R/Wt-*TP53* groups. (B) DEGs between the *MYC*-R/Mut-*TP53* and non-*MYC*-R/Mut-*TP53* groups. (C) DEGs between the Myc<sup>high</sup>/Mut-*TP53* and Myc<sup>low</sup>/Mut-*TP53* Groups. (D) DEGs between Myc<sup>high</sup>/Mut-*TP53* and Myc<sup>low</sup>/Wt-*TP53* groups.

**Supplementary Figure S4. Representative figures of flow cytometric analysis indicating G2/M phase-cell cycle arrest by NCB057643 treatment for 24 hours in cells with *MYC*-R or Myc overexpression with Wt-*TP53* (OCI-LY19) or Mut-*TP53* (GR and TMD8).**

**Supplementary Figure S5. Heatmap for significantly up- or downregulated proteins after INCB057643 treatment (5 $\mu$ M, 24 hours) in OCI-LY19 cells. The protein expression levels were measured by RPPA assays performed in three independent experiments.**



**Supplementary Figure S6. A MDM2 inhibitor DS3032b shows cytotoxic effects selectively in high-grade B-cell lymphoma (HGBCL) with *MYC/BCL2* double-hit (DH) and wild-type (Wt) *TP53*.** (A) Levels of p53 protein were markedly upregulated by DS3032b treatment (24 hours) in HGBCL-DH cells with Wt-*TP53* (OCI-LY19, OCI-LY10, MCA and RC) but not in those with *TP53* mutation (Mut-*TP53*, TMD8 and MZ). (B) DS3032b significantly suppressed cell viability of HGBCL-DH cells with Wt-*TP53* but not in cell lines with Mut-*TP53*. CellTiter-Glo® 2.0 Assays were performed after treatment for 72 hours. (C) The IC<sub>50</sub> values of DS3032b for four HGBCL-DH cell lines with Wt-*TP53* as calculated by GraphPad Prism 8. (D) Exposure with DS3032b for 48 hours induced apoptosis by Annexin V/PI dual staining in four HGBCL-DH cell lines with Wt-*TP53* but not in a HGBCL-DH cell line with Mut-*TP53*. (E) DS3032b treatment for 24 hours blocked the cell cycle at G<sub>0</sub>/G<sub>1</sub> phase, in parallel with the reduction of cell percentage at S phase in Wt-*TP53* cell lines. Values indicate mean ± SD for at least three independent experiments performed in triplicate.

**Supplementary Figure S7. Combined DS3032b and INCB057643 treatment has no synergistic cytotoxicity in DLBCL cell lines with *MYC* aberrations and *TP53* mutation (Mut-*TP53*).** Cell viability was measured by CellTiter-Glo® 2.0 Assay at 72 hours. Values indicate mean ± SD for at least three independent experiments performed in triplicate.

**Supplementary Figure S8. INCB057643 treatment (1.25 μM) alone or in combination with ABT-199 (venetoclax, 6.25 mM) for 24 hours induced p21 expression in TMD8 cells, whereas had no effect on p53 (mutant) expression levels.**

# Supplementary Figure S1

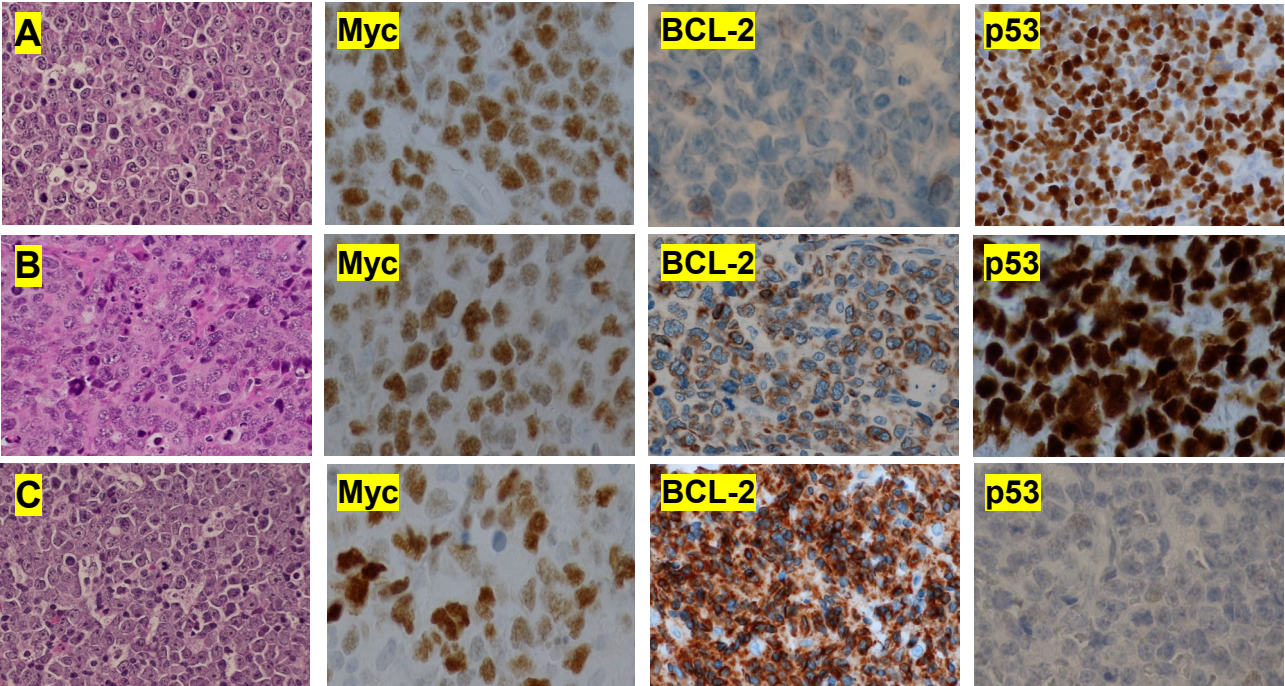

# Supplementary Figure S2

## All cases

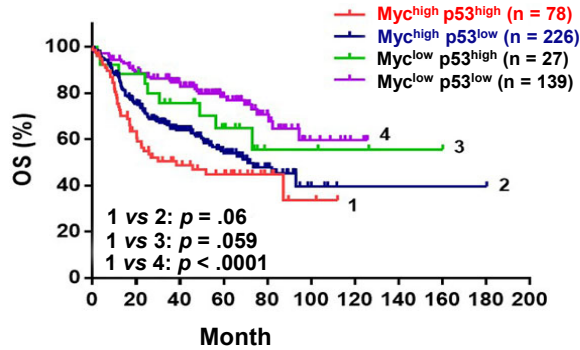

## ABC cases

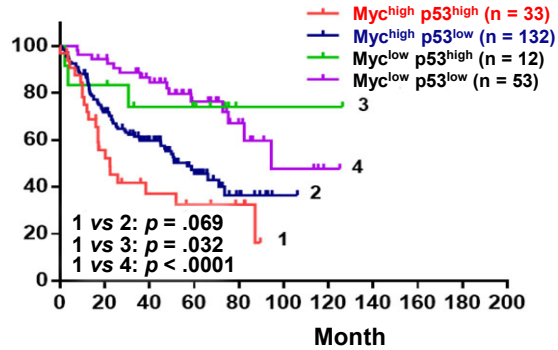

## GCB cases

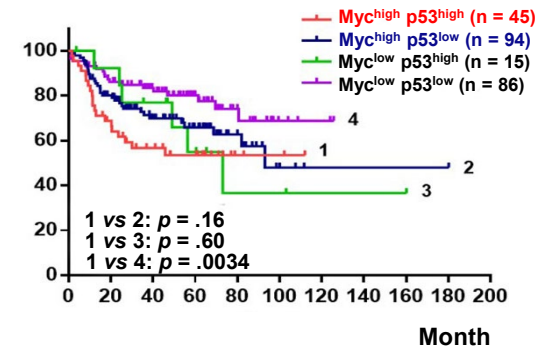

## All cases

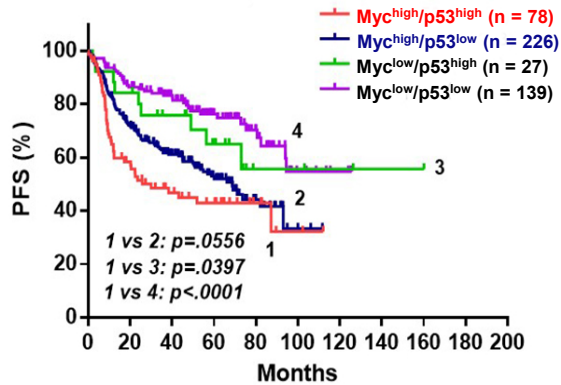

## ABC cases

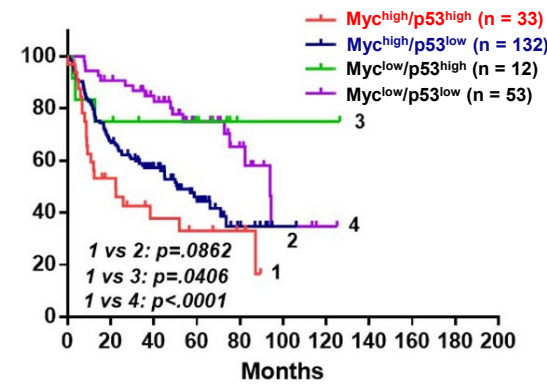

## GCB cases

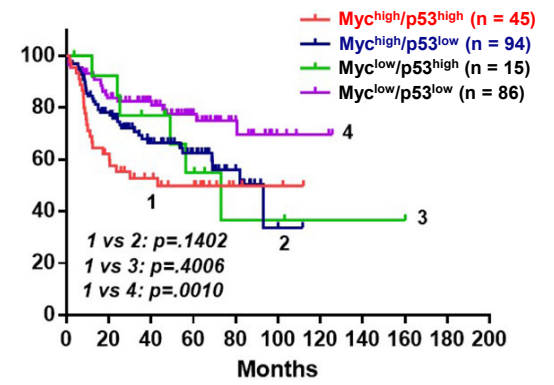



# Supplementary Figure S4

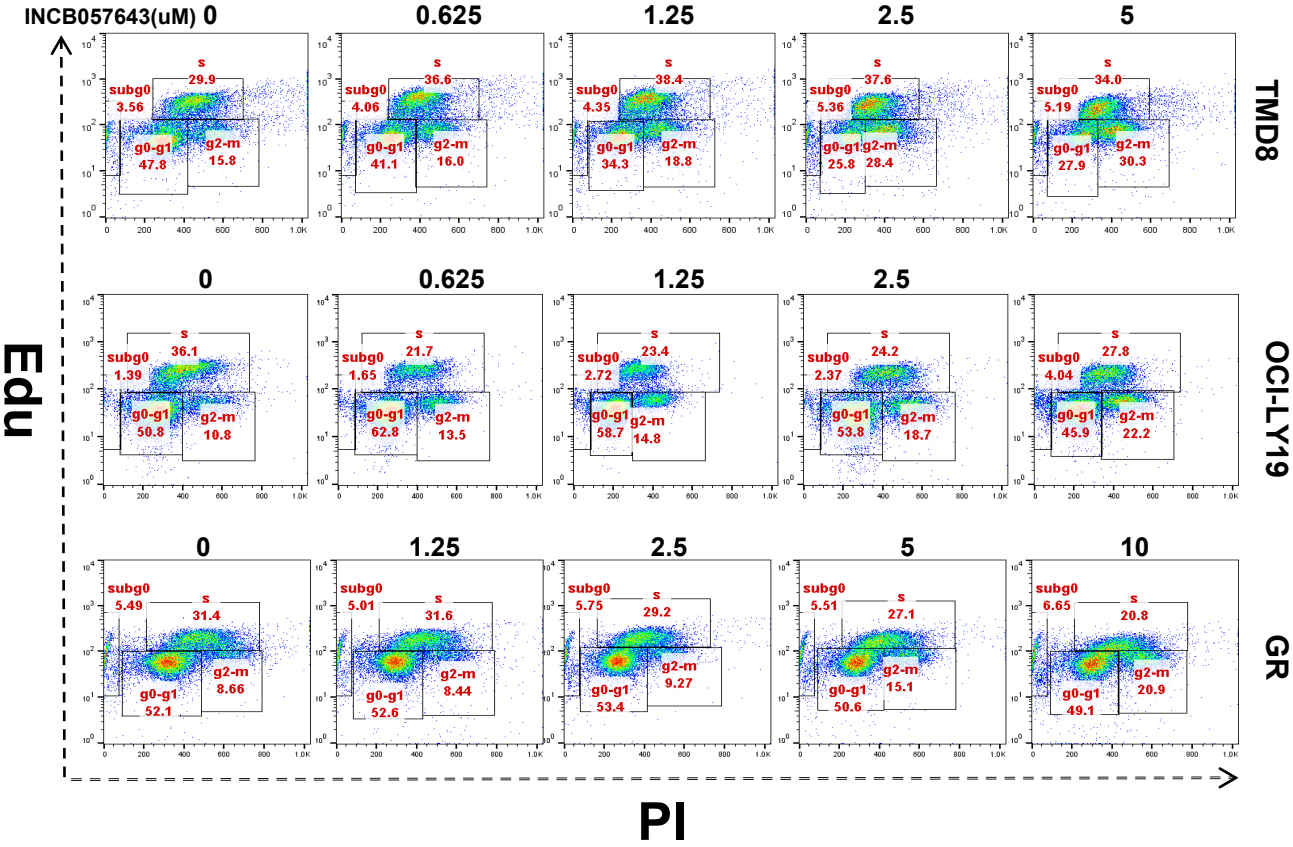

# Supplementary Figure S5

## INCB057643 treatment in OCI-LY19

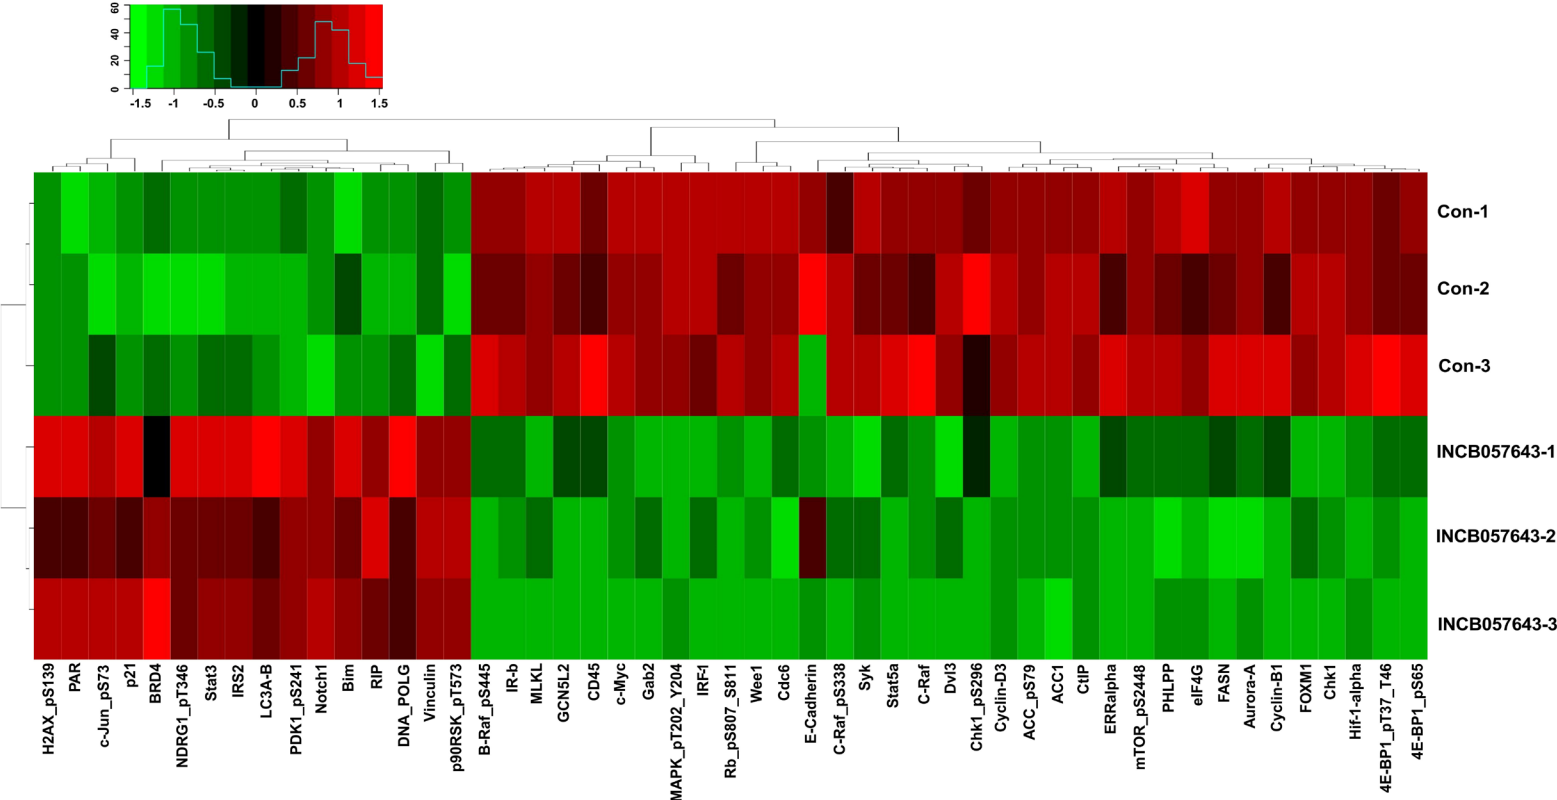

# Supplementary Figure S6

## A

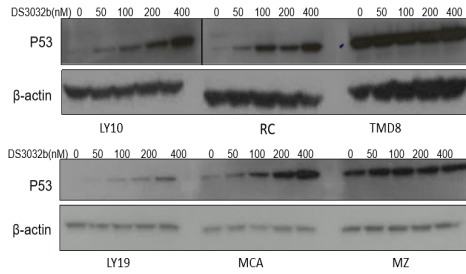

## B

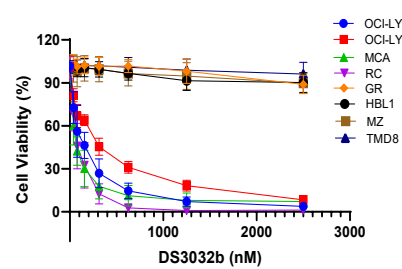

## C

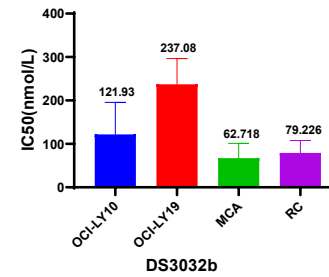

## D

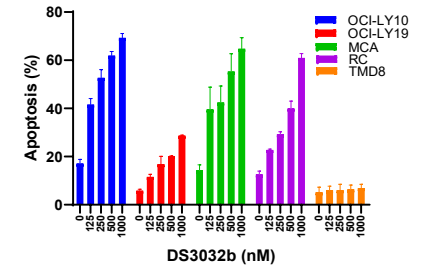

## E

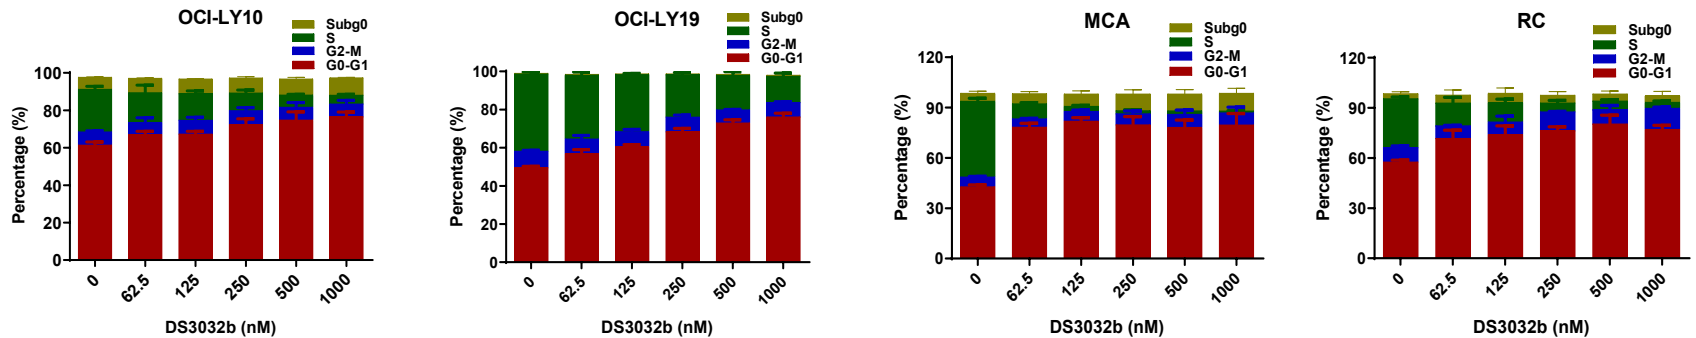

# Supplementary Figure S7

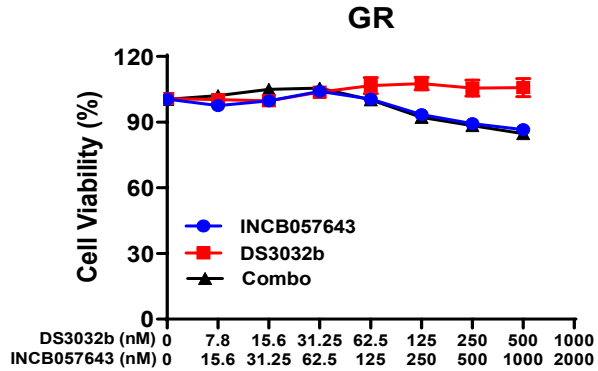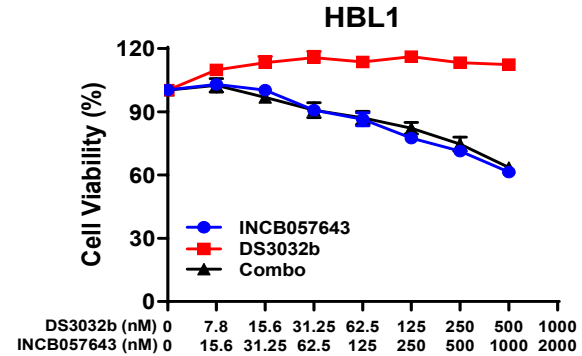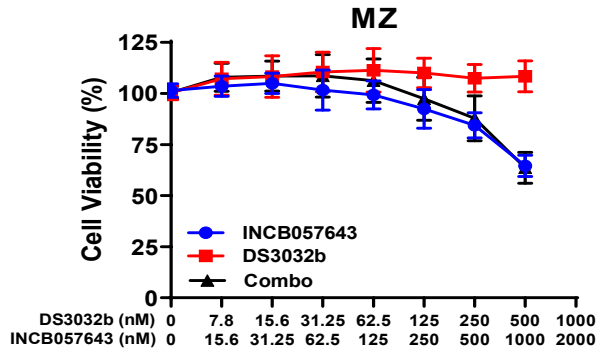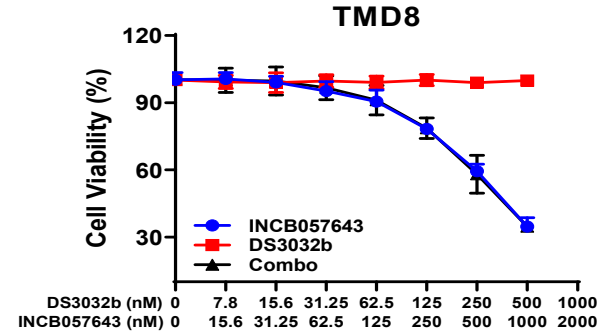



# Supplementary Figure S8

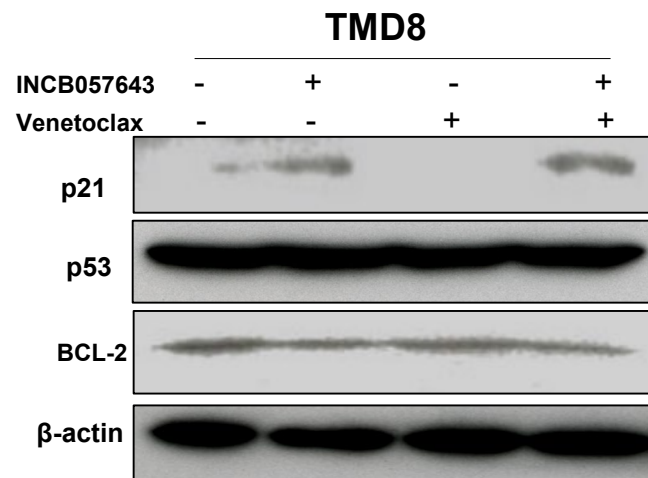

Supplement: NIHMS1693072-supplement-Suppl_Figures_Tables.pdf [file NIHMS1693072-supplement-Suppl_Figures_Tables.pdf]
